# Supplementary material for: Ceramic fibers do not exhibit larger toxicity in pulmonary epithelial cells than nanoparticles of the same chemical composition
Source: Royal Society of Chemistry journal article supplement (doi:10.1039/d2en00217e), 2022-01-01
Supplement: d2en00217e1.pdf [file d2en00217e1.pdf]

# **Ceramic fibers do not exhibit larger toxicity in pulmonary epithelial cells than nanoparticles of same chemical composition**

## **Supplementary Information**

Jana Báčová<sup>1</sup>, Luděk Hromádko<sup>2,3</sup>, Pavlína Nývltová<sup>1</sup>, Lenka Brůčková<sup>1</sup>, Martin Motola<sup>2,+</sup>,  
Roman Bulánek<sup>4</sup>, Martina Říhová<sup>2,3</sup>, Tomáš Roušar<sup>1\*</sup>, Jan M. Macak<sup>2,3\*</sup>

<sup>1</sup>Department of Biological and Biochemical Sciences, Faculty of Chemical Technology,  
University of Pardubice, Studentska 573, 532 10 Pardubice, Czech Republic

<sup>2</sup>Center of Materials and Nanotechnologies, Faculty of Chemical Technology, University of  
Pardubice Nam. Cs. Legii, 530 02 Pardubice, Czech Republic

<sup>3</sup>Central European Institute of Technology, Brno University of Technology, Purkynova 123,  
612 00 Brno, Czech Republic

<sup>4</sup>Department of Physical Chemistry, Faculty of Chemical Technology, University of  
Pardubice, Studentska 573, 532 10 Pardubice, Czech Republic

<sup>+</sup> Present address: Department of Inorganic Chemistry, Faculty of Natural Sciences, Comenius  
University in Bratislava, 842 15 Bratislava, Slovak Republic

### **\* Corresponding author (for the nanomaterials preparation and characterization):**

Dr. Jan M. Macak, Center of Materials and Nanotechnologies, Faculty of Chemical  
Technology, University of Pardubice, Nam. Cs. Legii, 532 10 Pardubice, Czech Republic,  
ORCID: 0000-0001-7091-3022, Telephone: +420 466 037 401

E-mail: [Jan.Macak@upce.cz](mailto:Jan.Macak@upce.cz)

### **\* Corresponding author (for the biological testing):**

Assoc. Prof. Tomáš Roušar, Department of Biological and Biochemical Sciences, Faculty of  
Chemical Technology, University of Pardubice, Studentska 573, 532 10 Pardubice, Czech  
Republic. ORCID: 0000-0002-6893-821X, Telephone: +420 466 037 707

E-mail: [Tomas.Rousar@upce.cz](mailto:Tomas.Rousar@upce.cz)

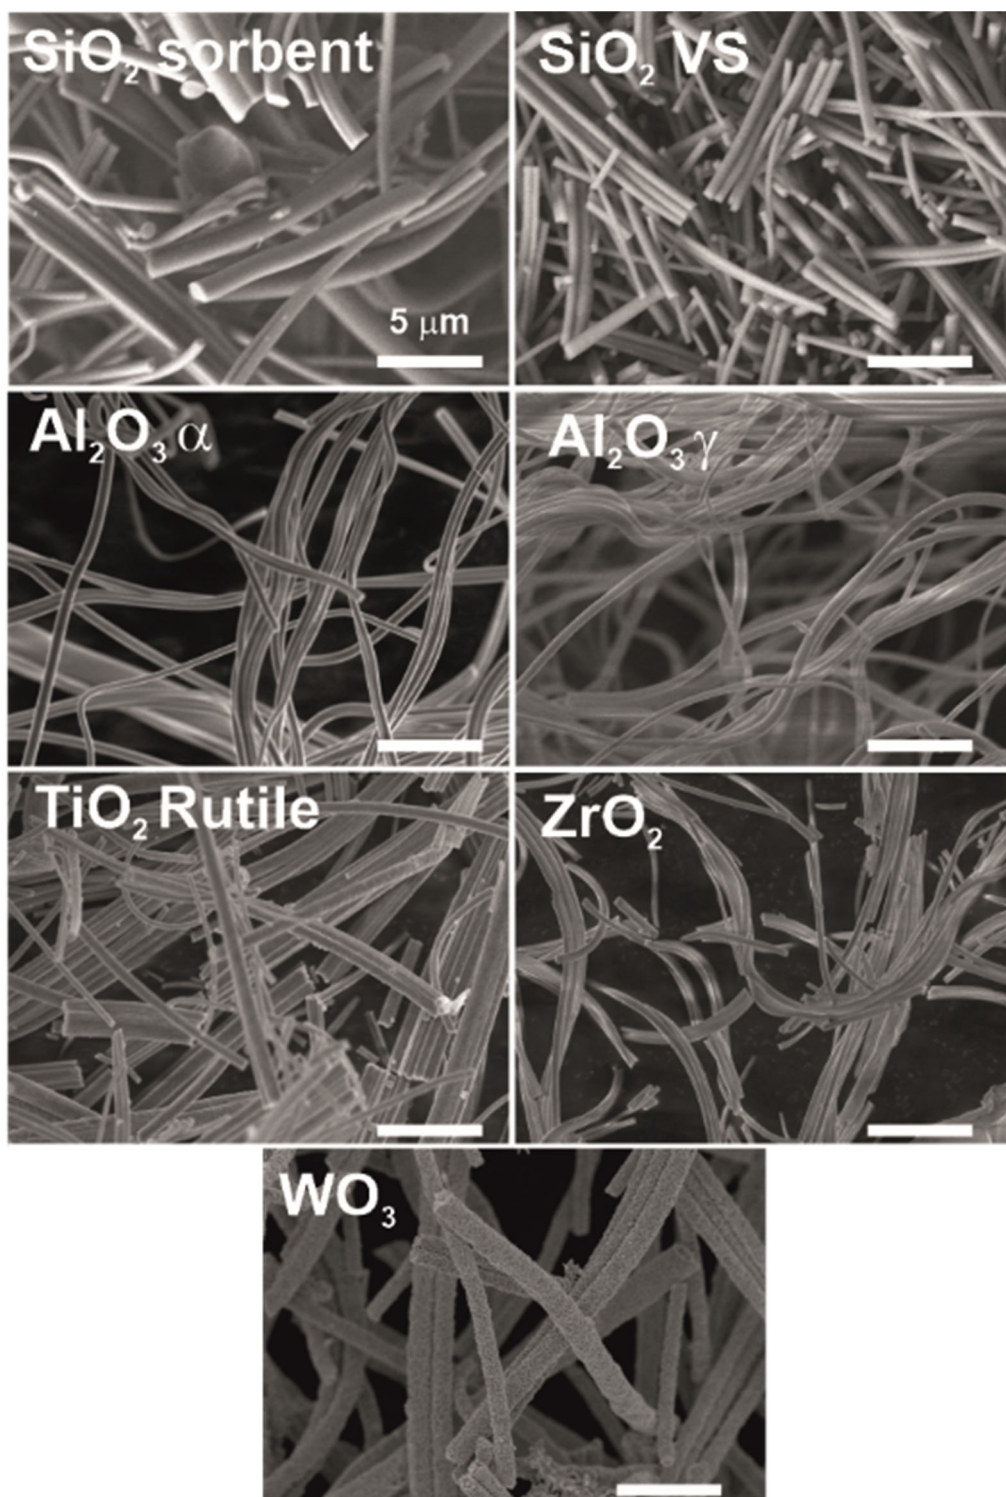

**Figure S1.** SEM images of as-prepared inorganic fibers (scale bar for all images represent 5  $\mu\text{m}$ ). Samples are identical to samples shown in Figure 1, but the magnification of these images is substantially higher.

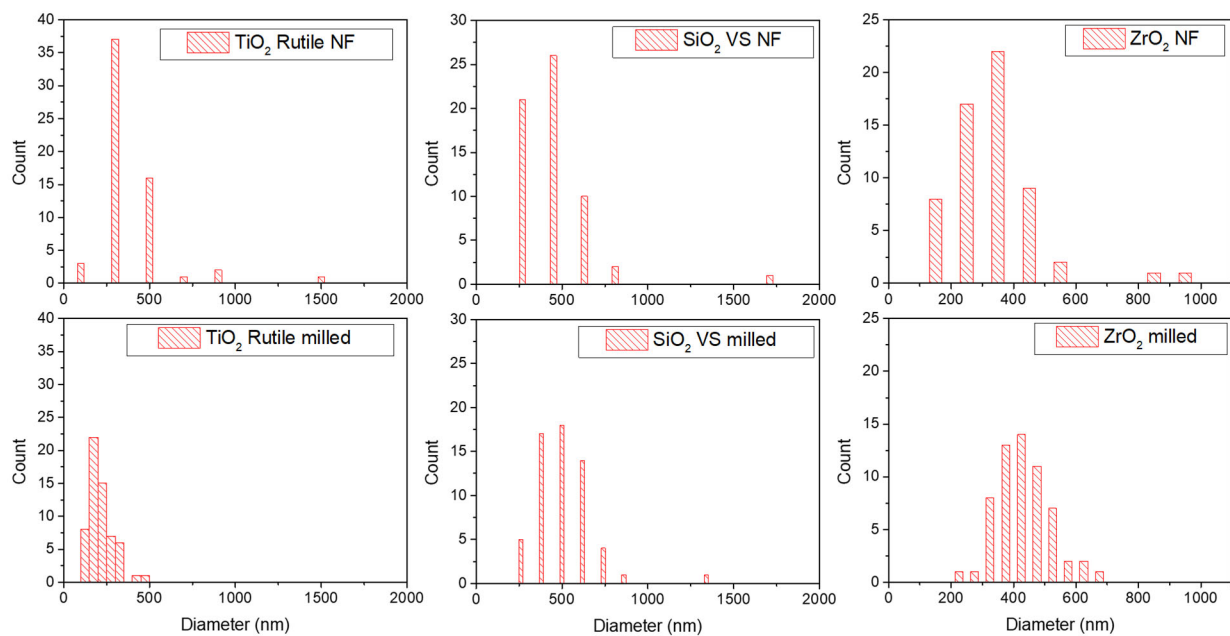

**Figure S2.** Statistical analyses of fiber diameters before (upper line) and after milling (lower line) for selected fibers. The number of measurements for each samples was  $n = 60$ .

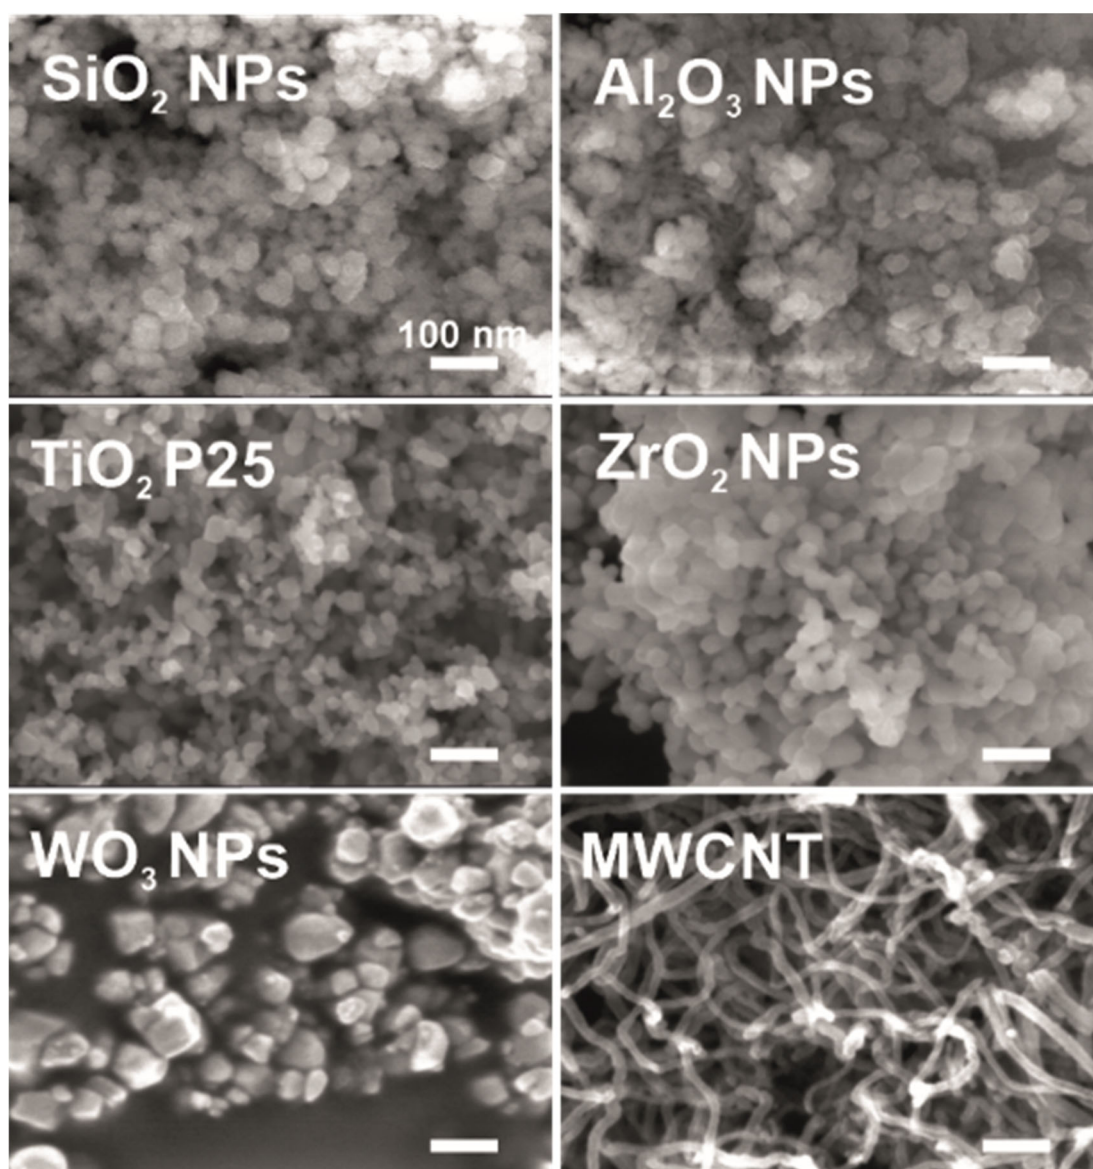

**Figure S3.** SEM images of all reference nanomaterials used in this work (scale bar for all images represent 100 nm).

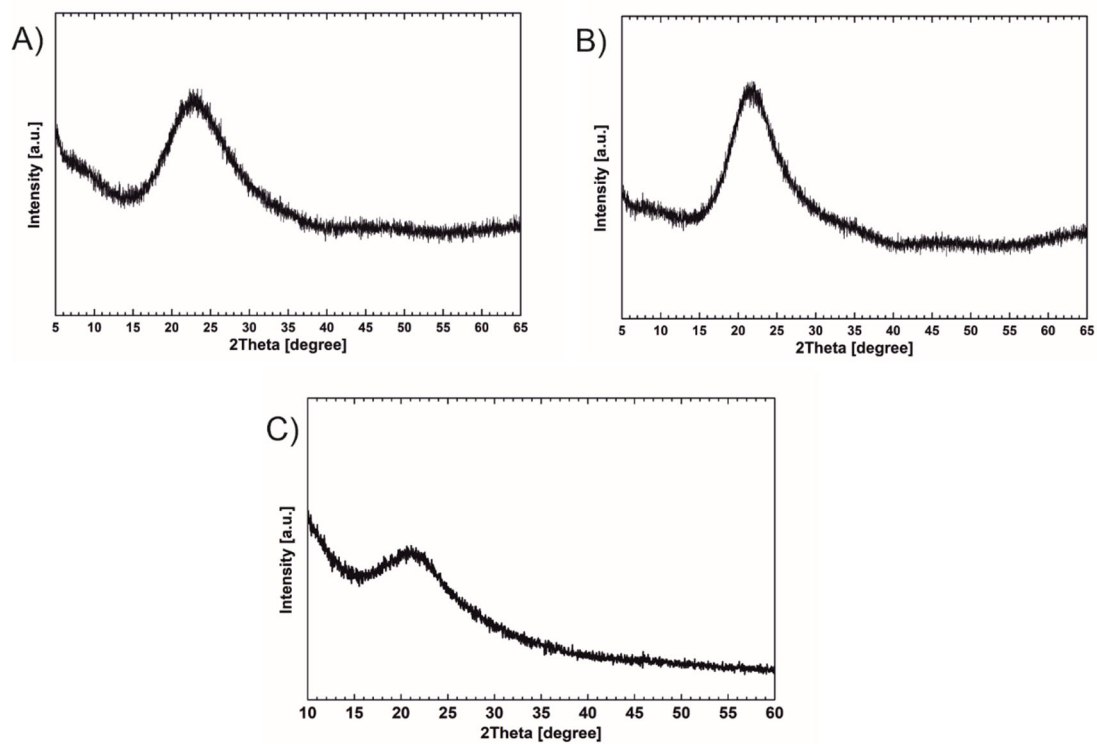

**Figure S4.** XRD patterns of amorphous samples of a) SiO<sub>2</sub> sorbent, b) SiO<sub>2</sub> VS, c) SiO<sub>2</sub> nanoparticles.



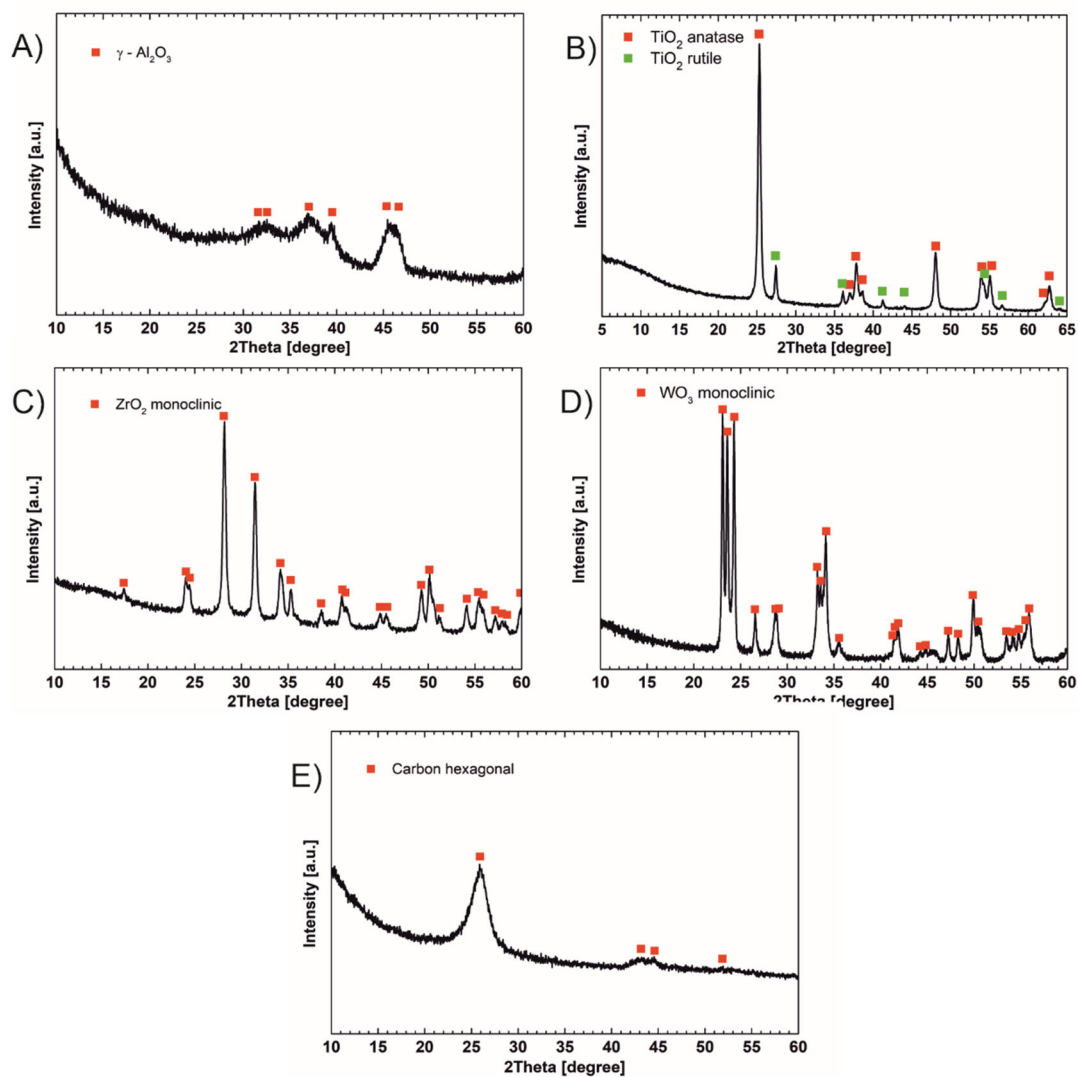

**Figure S5.** X-ray diffractograms of reference crystalline nanomaterials: a)  $\text{Al}_2\text{O}_3$   $\gamma$  nanoparticles, b)  $\text{TiO}_2$  P25 nanoparticles, c)  $\text{ZrO}_2$  nanoparticles, d)  $\text{WO}_3$  nanoparticles, e) multi-wall carbon nanotubes (MWCNT).

**Table S1. Dehydrogenase activity in pulmonary cells A549 after incubation with materials.** A549 cells were treated with fibers and nanoparticles for 24 and 48 h at concentrations 0-100  $\mu\text{g.mL}^{-1}$ . Multiwalled carbon nanotubes (MWCNT) were used as a positive control and untreated cells as a negative control. Dehydrogenase activity of A549 cells was assayed using the WST-1 test. The results are expressed as mean  $\pm$  SD (control = 100%; n = 12); \*,  $P < 0.05$ ; \*\*,  $P < 0.01$ ; \*\*\*,  $P < 0.001$  vs. untreated cells ( $P = 0.05$ ).

| Sample        |                                  | Concentration<br>[μg.mL <sup>-1</sup> ] | Incubation period            |                             |
|---------------|----------------------------------|-----------------------------------------|------------------------------|-----------------------------|
|               |                                  |                                         | 24 h                         | 48 h                        |
| Control       |                                  | 0                                       | 100 ± 2%                     | 100 ± 4%                    |
| Fibers        | Al <sub>2</sub> O <sub>3</sub> α | 1                                       | 101 ± 4%                     | 96 ± 7%                     |
|               |                                  | 10                                      | 99 ± 4%                      | 93 ± 6%                     |
|               |                                  | 100                                     | 83 ± 7% ( <i>P</i> < 0.001)  | 82 ± 7% ( <i>P</i> < 0.001) |
|               | Al <sub>2</sub> O <sub>3</sub> γ | 1                                       | 98 ± 3%                      | 98 ± 5%                     |
|               |                                  | 10                                      | 106 ± 4%                     | 106 ± 4%                    |
|               |                                  | 100                                     | 98 ± 5%                      | 93 ± 5%                     |
|               | SiO <sub>2</sub> Vs              | 1                                       | 104 ± 3%                     | 99 ± 4%                     |
|               |                                  | 10                                      | 97 ± 10%                     | 90 ± 5% ( <i>P</i> = 0.006) |
|               |                                  | 100                                     | 96 ± 2%                      | 87 ± 4% ( <i>P</i> < 0.001) |
|               | SiO <sub>2</sub> Sorbent         | 1                                       | 101 ± 3%                     | 102 ± 5%                    |
|               |                                  | 10                                      | 105 ± 4%                     | 107 ± 4%                    |
|               |                                  | 100                                     | 102 ± 2%                     | 93 ± 5%                     |
|               | ZrO <sub>2</sub>                 | 1                                       | 97 ± 7%                      | 98 ± 6%                     |
|               |                                  | 10                                      | 99 ± 4%                      | 94 ± 6%                     |
|               |                                  | 100                                     | 98 ± 3%                      | 97 ± 6%                     |
|               | TiO <sub>2</sub> Rutile          | 1                                       | 102 ± 5%                     | 101 ± 5%                    |
|               |                                  | 10                                      | 99 ± 5%                      | 100 ± 6%                    |
|               |                                  | 100                                     | 91 ± 5% ( <i>P</i> = 0.004)  | 87 ± 5% ( <i>P</i> < 0.001) |
|               | WO <sub>3</sub>                  | 1                                       | 100 ± 8%                     | 105 ± 5%                    |
|               |                                  | 10                                      | 92 ± 11% ( <i>P</i> = 0.013) | 98 ± 9%                     |
|               |                                  | 100                                     | 91 ± 5% ( <i>P</i> = 0.005)  | 105 ± 8%                    |
| Nanoparticles | Al <sub>2</sub> O <sub>3</sub>   | 1                                       | 100 ± 7%                     | 95 ± 3%                     |
|               |                                  | 10                                      | 97 ± 3%                      | 92 ± 5%                     |
|               |                                  | 100                                     | 90 ± 5% ( <i>P</i> < 0.001)  | 86 ± 5% ( <i>P</i> < 0.001) |
|               | SiO <sub>2</sub>                 | 1                                       | 104 ± 6%                     | 98 ± 5%                     |
|               |                                  | 10                                      | 102 ± 5%                     | 94 ± 4%                     |
|               |                                  | 100                                     | 96 ± 5%                      | 86 ± 2% ( <i>P</i> < 0.001) |
|               | ZrO <sub>2</sub>                 | 1                                       | 100 ± 5%                     | 98 ± 7%                     |
|               |                                  | 10                                      | 100 ± 6%                     | 105 ± 4%                    |
|               |                                  | 100                                     | 99 ± 5%                      | 97 ± 8%                     |
|               | TiO <sub>2</sub> P25             | 1                                       | 100 ± 4%                     | 100 ± 3%                    |
|               |                                  | 10                                      | 98 ± 5%                      | 106 ± 3%                    |
|               |                                  | 100                                     | 92 ± 5% ( <i>P</i> = 0.014)  | 86 ± 5% ( <i>P</i> < 0.001) |
|               | WO <sub>3</sub>                  | 1                                       | 94 ± 7%                      | 96 ± 5%                     |
|               |                                  | 10                                      | 94 ± 7%                      | 97 ± 6%                     |
|               |                                  | 100                                     | 91 ± 5% ( <i>P</i> = 0.002)  | 101 ± 7%                    |
| MWCNT         |                                  | 1                                       | 101 ± 6%                     | 98 ± 4%                     |
|               |                                  | 10                                      | 95 ± 5%                      | 90 ± 3% ( <i>P</i> < 0.003) |
|               |                                  | 100                                     | 73 ± 5% ( <i>P</i> < 0.001)  | 63 ± 8% ( <i>P</i> < 0.001) |

**Table S2. Glutathione levels in pulmonary cells A549 after incubation with materials.** A549 cells were treated with fibers and nanoparticles for 24 and 48 h at concentrations 0-100  $\mu\text{g.mL}^{-1}$ . Multiwalled carbon nanotubes (*MWCNT*) were used as a positive control and untreated cells as a negative control. Glutathione levels in cells were measured using the monochlorobimane assay. The results are expressed as mean  $\pm$  SD (control = 100%; n = 12); \*,  $P < 0.05$ ; \*\*,  $P < 0.01$ ; \*\*\*,  $P < 0.001$  vs. untreated cells ( $P = 0.05$ ).

| Sample               |                                  | Concentration<br>[μg.mL <sup>-1</sup> ] | Incubation period            |                             |
|----------------------|----------------------------------|-----------------------------------------|------------------------------|-----------------------------|
|                      |                                  |                                         | 24 h                         | 48 h                        |
| Control              |                                  | 0                                       | 100 ± 4%                     | 100 ± 4%                    |
| Fibers               | Al <sub>2</sub> O <sub>3</sub> α | 1                                       | 103 ± 4%                     | 100 ± 5%                    |
|                      |                                  | 10                                      | 101 ± 5%                     | 98 ± 4%                     |
|                      |                                  | 100                                     | 86 ± 6% ( <i>P</i> < 0.001)  | 82 ± 5% ( <i>P</i> < 0.001) |
|                      | Al <sub>2</sub> O <sub>3</sub> γ | 1                                       | 102 ± 4%                     | 98± 6%                      |
|                      |                                  | 10                                      | 103 ± 5%                     | 100 ± 4%                    |
|                      |                                  | 100                                     | 83 ± 5% ( <i>P</i> < 0.001)  | 82 ± 4% ( <i>P</i> < 0.001) |
|                      | SiO <sub>2</sub> Vs              | 1                                       | 102 ± 8%                     | 101 ± 5%                    |
|                      |                                  | 10                                      | 101 ± 3%                     | 105 ± 5%                    |
|                      |                                  | 100                                     | 97 ± 4%                      | 92 ± 5% ( <i>P</i> = 0.001) |
|                      | SiO <sub>2</sub><br>Sorbent      | 1                                       | 105 ± 6%                     | 106 ± 4%                    |
|                      |                                  | 10                                      | 98 ± 3%                      | 99 ± 4%                     |
|                      |                                  | 100                                     | 101 ± 5%                     | 99 ± 3%                     |
|                      | ZrO <sub>2</sub>                 | 1                                       | 97 ± 7%                      | 101 ± 5%                    |
|                      |                                  | 10                                      | 99 ± 4%                      | 100 ± 3%                    |
|                      |                                  | 100                                     | 94 ± 3%                      | 95 ± 4%                     |
|                      | TiO <sub>2</sub> Rutile          | 1                                       | 93 ± 11%                     | 98 ± 3%                     |
|                      |                                  | 10                                      | 99 ± 8%                      | 100 ± 3%                    |
|                      |                                  | 100                                     | 80 ± 7% ( <i>P</i> < 0.001)  | 77 ± 6% ( <i>P</i> < 0.001) |
|                      | WO <sub>3</sub>                  | 1                                       | 105 ± 5%                     | 102 ± 3%                    |
|                      |                                  | 10                                      | 103 ± 3%                     | 101 ± 4%                    |
|                      |                                  | 100                                     | 93 ± 8%                      | 90 ± 2% ( <i>P</i> < 0.001) |
|                      | Nanoparticles                    | Al <sub>2</sub> O <sub>3</sub>          | 1                            | 107 ± 4%                    |
| 10                   |                                  |                                         | 106 ± 5%                     | 102 ± 5%                    |
| 100                  |                                  |                                         | 99 ± 7%                      | 95 ± 6%                     |
| SiO <sub>2</sub>     |                                  | 1                                       | 105 ± 5%                     | 107 ± 3%                    |
|                      |                                  | 10                                      | 105 ± 9%                     | 107 ± 6%                    |
|                      |                                  | 100                                     | 99 ± 3%                      | 99 ± 5%                     |
| ZrO <sub>2</sub>     |                                  | 1                                       | 105 ± 10%                    | 105 ± 2%                    |
|                      |                                  | 10                                      | 95 ± 2%                      | 96 ± 2%                     |
|                      |                                  | 100                                     | 95 ± 5%                      | 95 ± 4%                     |
| TiO <sub>2</sub> P25 |                                  | 1                                       | 104 ± 6%                     | 101 ± 5%                    |
|                      |                                  | 10                                      | 91 ± 4% ( <i>P</i> = 0.017)  | 92 ± 4% ( <i>P</i> = 0.004) |
|                      |                                  | 100                                     | 87 ± 4% ( <i>P</i> < 0.001)  | 83 ± 3% ( <i>P</i> < 0.001) |
| WO <sub>3</sub>      |                                  | 1                                       | 107 ± 4%                     | 106 ± 4%                    |
|                      |                                  | 10                                      | 101 ± 6%                     | 104 ± 6%                    |
|                      |                                  | 100                                     | 100 ± 4%                     | 103 ± 5%                    |
| MWCNT                |                                  | 1                                       | 106 ± 5%                     | 105 ± 5%                    |
|                      |                                  | 10                                      | 104 ± 5%                     | 103 ± 6%                    |
|                      |                                  | 100                                     | 78 ± 12% ( <i>P</i> < 0.001) | 74± 11% ( <i>P</i> < 0.001) |



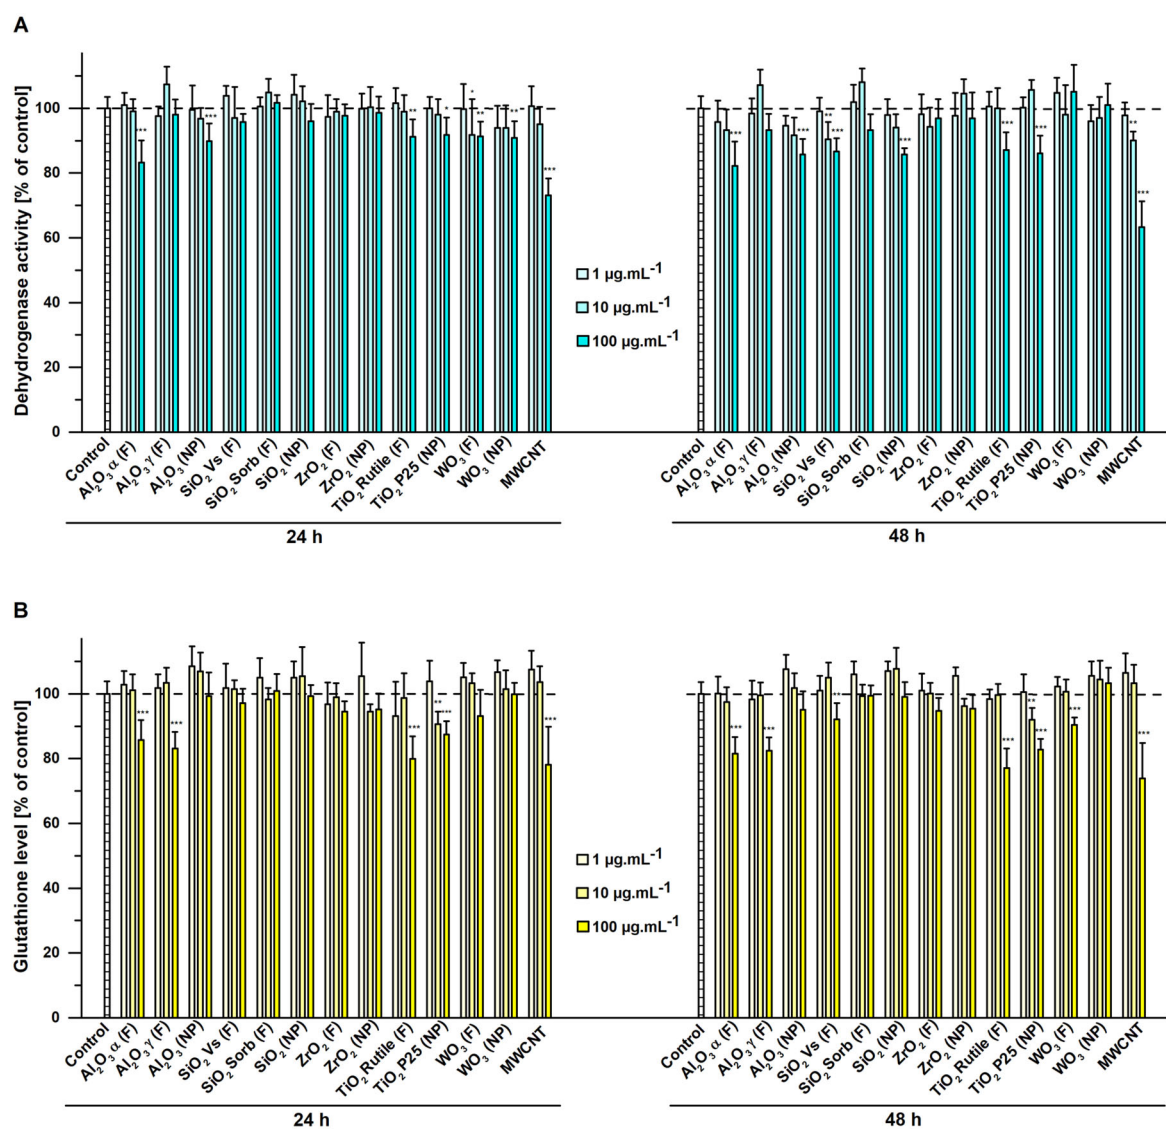

**Figure S6. Effect of fibers (F) and nanoparticles (NP) on dehydrogenase activity (A) and glutathione levels (B) in A549 cells after 24 and 48 h of treatment. Data are expressed as means  $\pm$  SD (n = 12). \*,  $P < 0.05$ , \*\*,  $P < 0.01$ , \*\*\*,  $P < 0.001$  vs. untreated control cells.**
